# Supplementary material
Source: Springer Nature journal article supplement (https://www.springermedizin.de/resource/supplementary/12943_2013_1524_MOESM3_ESM.pdf/9552454)

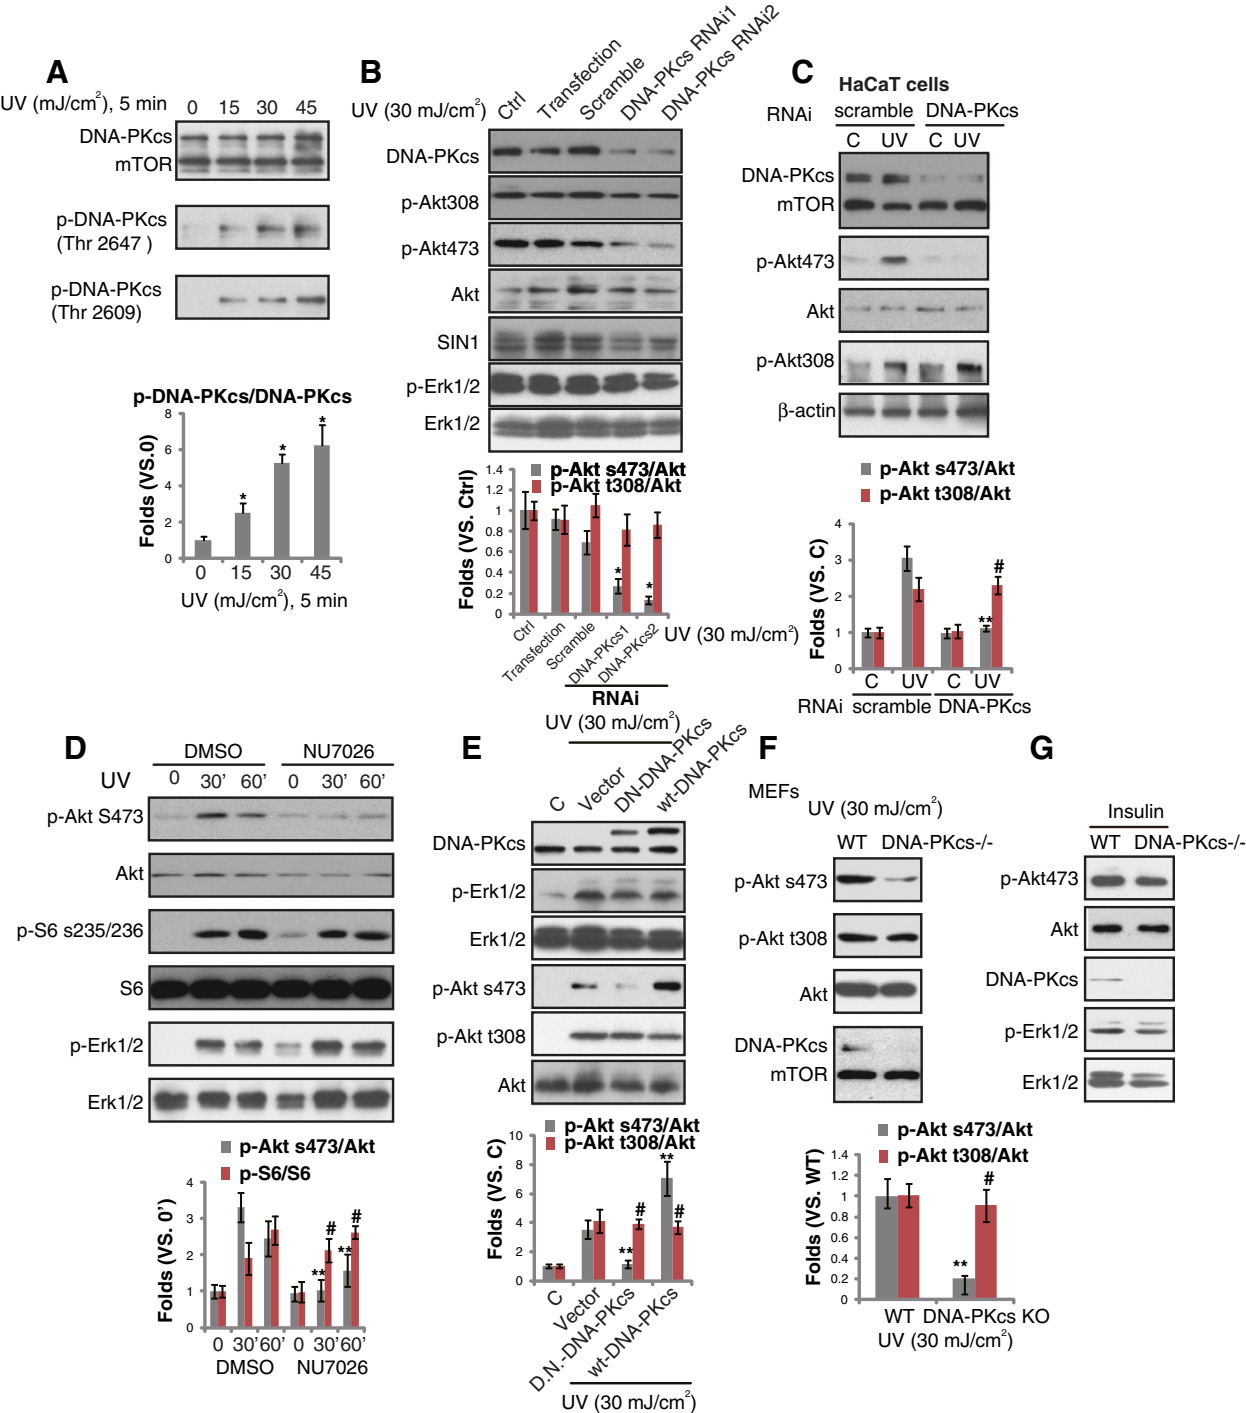

Supplement: MOESM3 [file 9552454]
